# Supplementary material for: Endoscopic findings in the upper gastrointestinal tract in patients with Crohn’s disease are common, highly specific, and associated with chronic gastritis
Source: PubMed Central journal article supplement (PMC9839771; doi:10.1038/s41598-022-21630-5), 2023-01-13
Supplement: 41598_2022_21630_MOESM1_ESM.pdf [file 41598_2022_21630_MOESM1_ESM.pdf]

**Supplementary Table 1. Prevalence and types of endoscopic findings among patients with Crohn’s disease and healthy individuals together with statistical comparison.** Analyses were conducted separately for whole population of recruited individuals and separately for H. pylori negative population of non-IBD and CD patients.

|                                    | <b>All</b>                              |                                |          | <b><i>H. pylori</i> negative</b>       |                                |          |
|------------------------------------|-----------------------------------------|--------------------------------|----------|----------------------------------------|--------------------------------|----------|
|                                    | <b>non-IBD individuals</b><br>(n = 295) | <b>CD patients</b><br>(n = 80) | <b>p</b> | <b>non-IBD individuals</b><br>(n = 93) | <b>CD patients</b><br>(n = 58) | <b>p</b> |
| <b><u>Esophagus</u></b>            |                                         |                                |          |                                        |                                |          |
| Erosions                           | 6 (2.0%)                                | 0 (0%)                         | 0.23     | 2 (2.2%)                               | 0 (0%)                         | 0.83     |
| Ulcerations                        | 2 (0.7%)                                | 0 (0%)                         | 0.62     | 1 (1.1%)                               | 0 (0%)                         | 0.62     |
| Barrett’s metaplasia               | 6 (2.0%)                                | 0 (0%)                         | 0.23     | 1 (1.1%)                               | 0 (0%)                         | 0.62     |
| <b><u>Stomach</u></b>              |                                         |                                |          |                                        |                                |          |
| Ulcerations                        | 8 (2.7%)                                | 2 (2.5%)                       | 0.65     | 1 (1.1%)                               | 2 (3.5%)                       | 0.33     |
| Polyps                             | 8 (2.7%)                                | 3 (3.8%)                       | 0.41     | 4 (4.3%)                               | 3 (5.2%)                       | 0.55     |
| Portal gastropathy                 | 4 (1.4%)                                | 3 (3.8%)                       | 0.16     | 1 (1.1%)                               | 2 (3.5%)                       | 0.33     |
| Hyperplasia of gastric folds       | 30 (10.2%)                              | 11 (4.1%)                      | 0.16     | 9 (9.7%)                               | 11 (19.0%)                     | 0.08     |
| <b><u>Duodenum</u></b>             |                                         |                                |          |                                        |                                |          |
| Flattening of the intestinal villi | 3 (1.0%)                                | 3 (3.8%)                       | 0.11     | 1 (1.1%)                               | 2 (3.5%)                       | 0.33     |
| Erosions                           | 6 (2.0%)                                | 3 (3.8%)                       | 0.30     | 1 (1.1%)                               | 3 (5.2%)                       | 0.16     |

|                             |           |          |      |  |          |          |       |
|-----------------------------|-----------|----------|------|--|----------|----------|-------|
| Mucosal inflammation        | 12 (4.1%) | 4 (5.0%) | 0.46 |  | 0 (0.0%) | 3 (5.2%) | 0.06  |
| Brunner's gland hyperplasia | 0 (0.0%)  | 1 (1.3%) | 0.21 |  | 0 (0.0%) | 0 (0.0%) | ----- |

---

CD – Crohn's disease

IBD – inflammatory bowel disease

p – level of significance
